# Supplementary material for: Ginsenoside Rg3 Improves Recovery from Spinal Cord Injury in Rats via Suppression of Neuronal Apoptosis, Pro-Inflammatory Mediators, and Microglial Activation
Source: MDPI journal article supplement (doi:10.3390/molecules22010122), 2017-01-12
Supplement: s1 [file s1]

# Supplementary Materials: Ginsenoside Rg3 Improves Recovery from Spinal Cord Injury in Rats via Suppression of Neuronal Apoptosis, Pro-Inflammatory Mediators, and Microglial Activation

Dong-Kyu Kim, Ki-Jung Kweon, Pyungsoo Kim, Hee-Jung Kim, Sung-Soo Kim, Nak-Won Sohn, Sungho Maeng and Jung-Won Shin

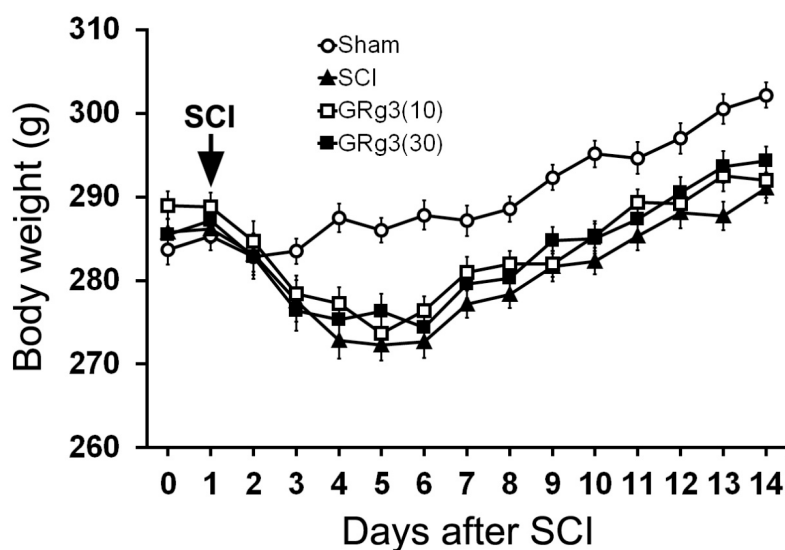

**Figure S1.** Changes in body weight of rats subjected to spinal cord injury (SCI). The body weight of all rats in the SCI, GRg3(10), and GRg3(30) groups decreased significantly during first 3 days after SCI. Data are represented as mean  $\pm$  SEM ( $n = 18$  in each group).
